# Supplementary material for: Multilocus Molecular Phylogeny of the Umbilicaria aprina Group (Umbilicariaceae, Lichenized Ascomycota) Supports Species Level and Neo-Endemic Status of Umbilicaria krascheninnikovii
Source: MDPI journal article supplement (doi:10.3390/plants13050729), 2024-03-04
Supplement: s1 [file s1]

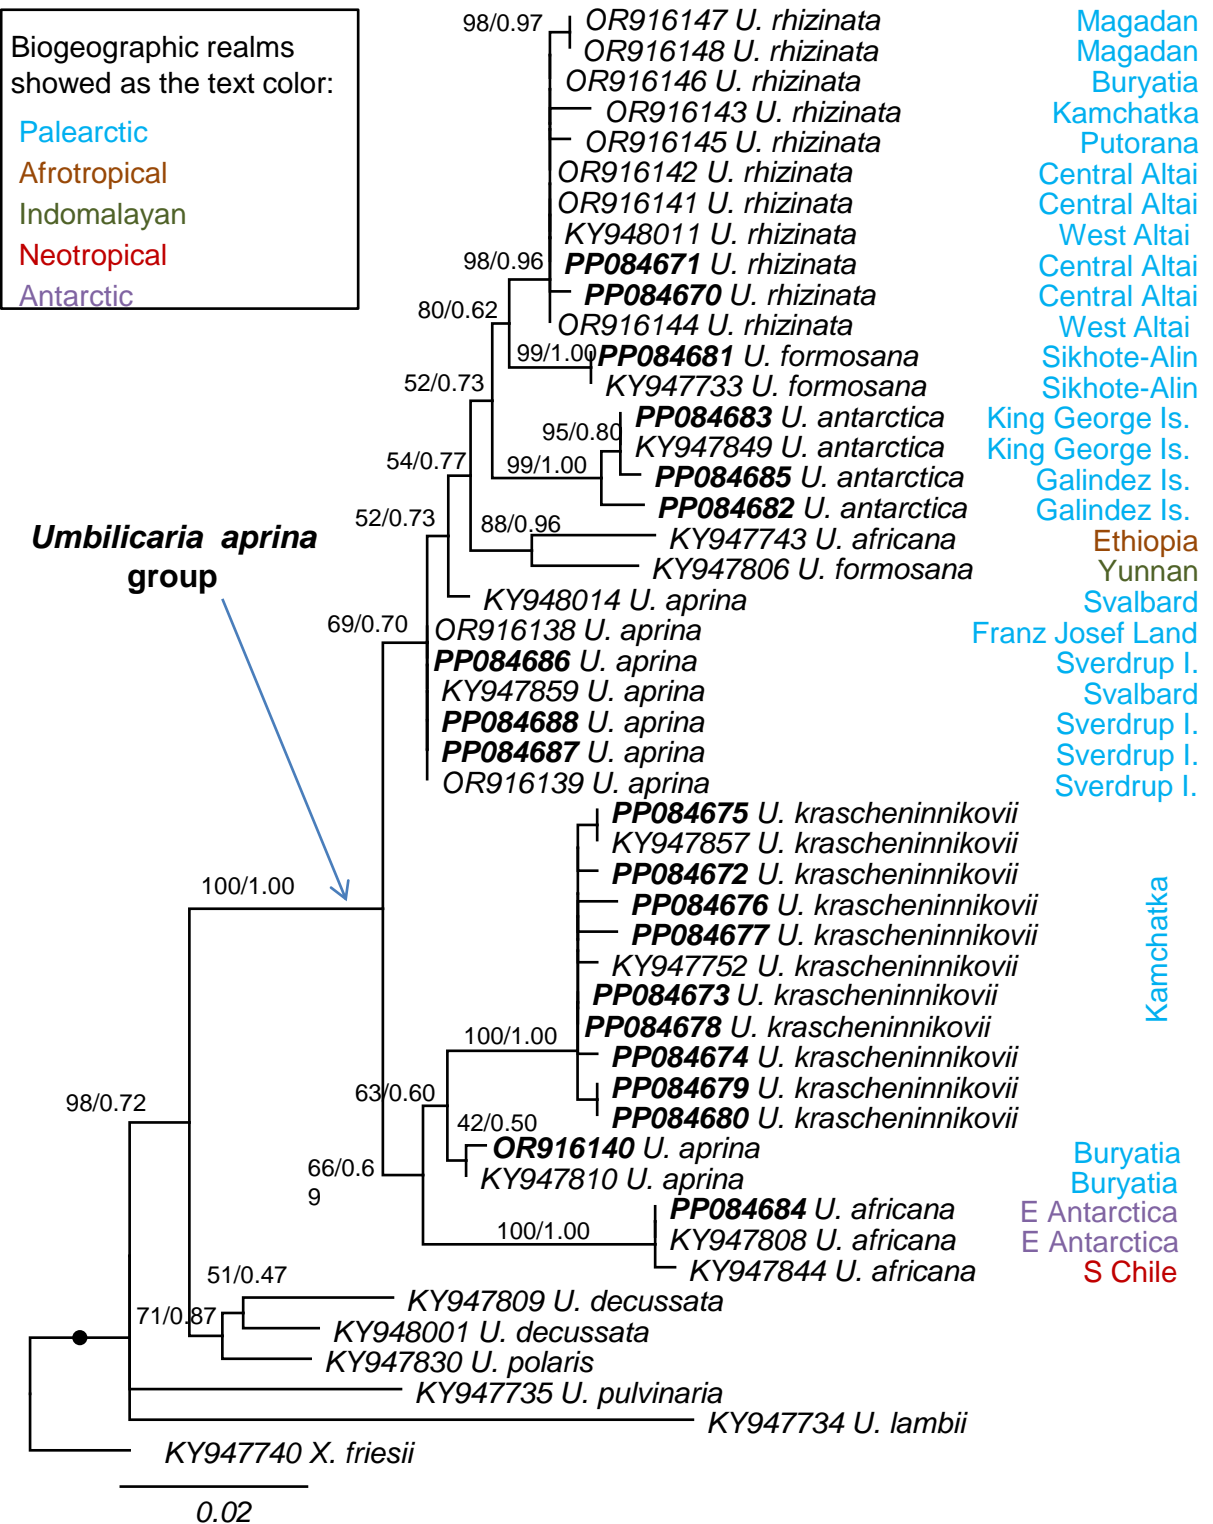

**Figure S1.** Phylogeny of *Umbilicaria aprina* group based on Maximum Likelihood analysis with IQ-TREE algorithm using the internal transcribed spacer region (ITS) sequences. The species names and GenBank accession numbers are indicated. The number in each node represents bootstrap support (BS) and posterior probability (PP). Branch lengths represent the estimated number of substitutions per site assuming the respective models of substitution. An exception is the branch with a black dot, which was shortened to reduce the overall figure size.

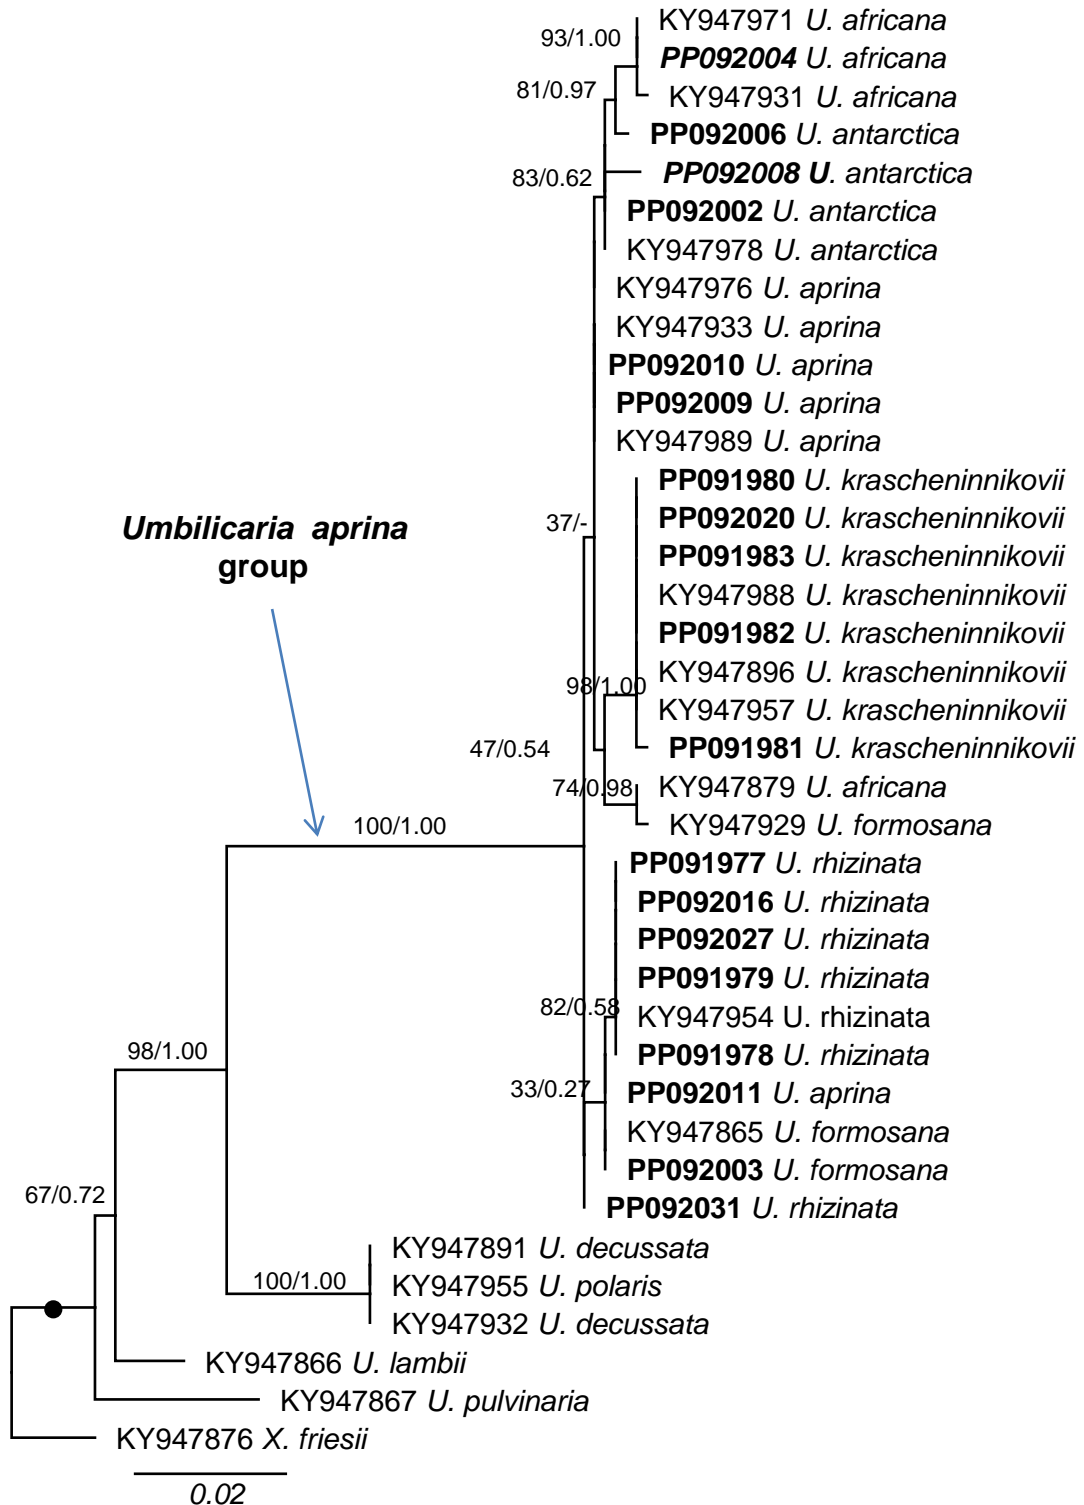

**Figure S2.** Phylogeny of *Umbilicaria aprina* group based on Maximum Likelihood analysis with IQ-TREE algorithm using the large subunit of the mitochondrial ribosomal DNA (mtLSU) sequences. The species names and GenBank accession numbers are indicated. The number in each node represents bootstrap support (BS) and posterior probability (PP). Branch lengths represent the estimated number of substitutions per site assuming the respective models of substitution. An exception is the branch with a black dot, which was shortened to reduce the overall figure size.

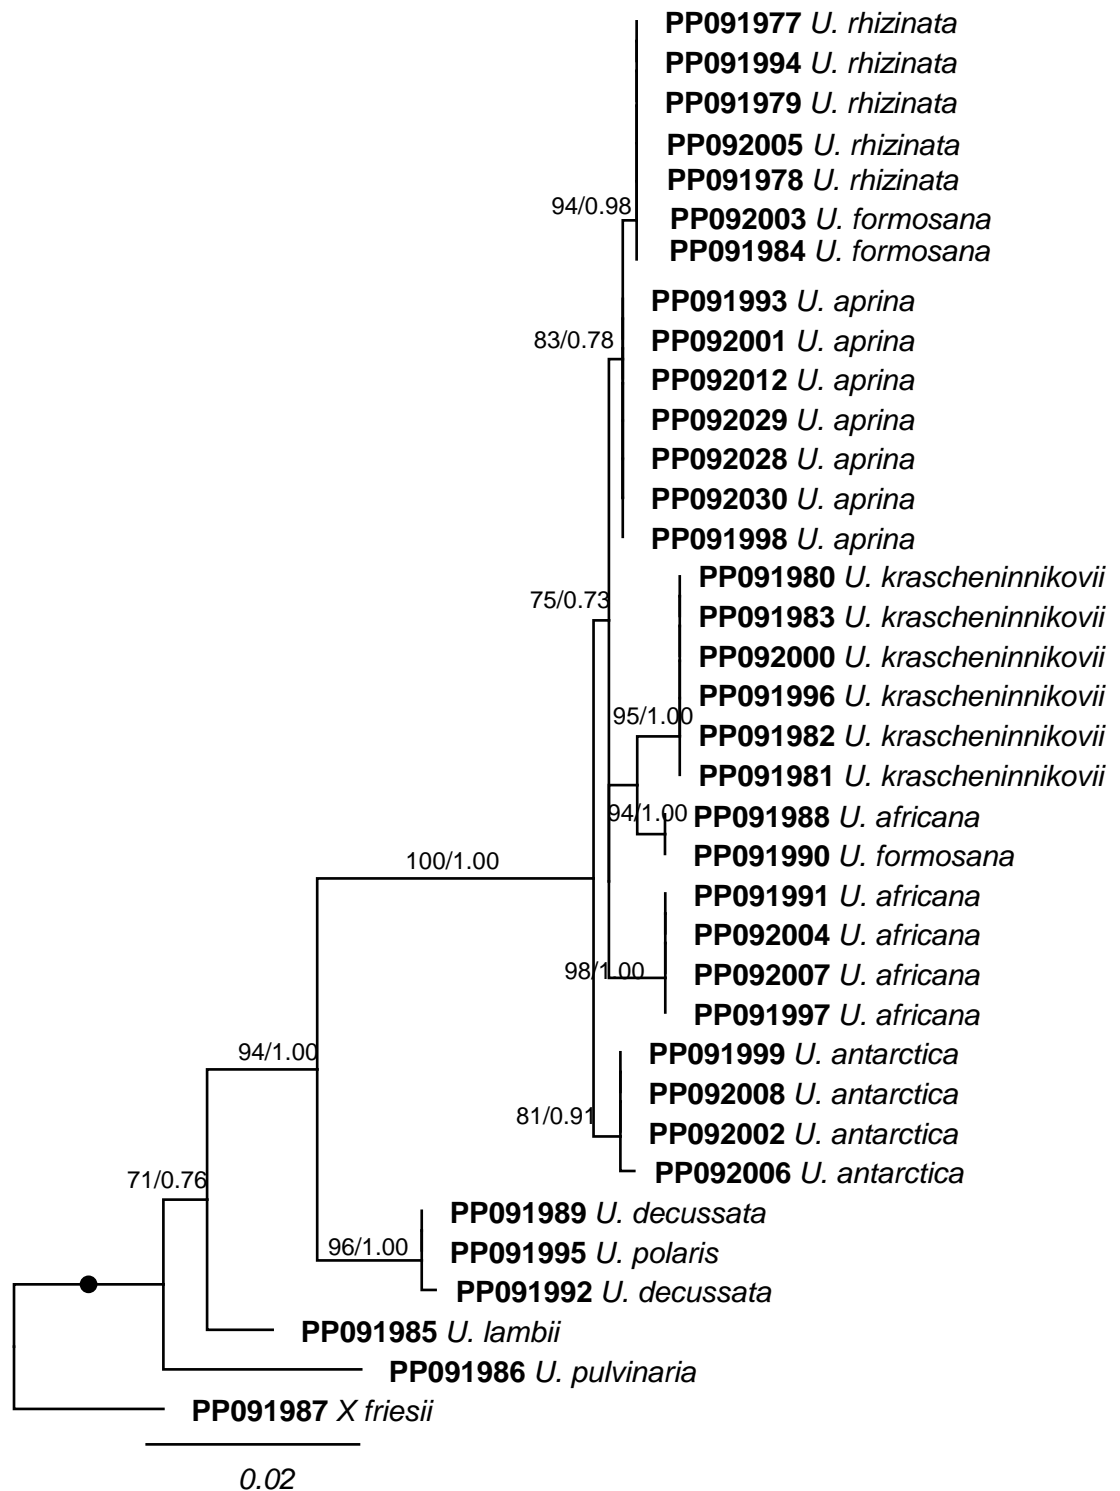

**Figure S3.** Phylogeny of *Umbilicaria aprina* group based on Maximum Likelihood analysis with IQ-TREE algorithm using the small subunit of the mitochondrial ribosomal DNA (mtSSU) sequences. The species names and GenBank accession numbers are indicated. The number in each node represents bootstrap support (BS) and posterior probability (PP). Branch lengths represent the estimated number of substitutions per site assuming the respective models of substitution. An exception is the branch with a black dot, which was shortened to reduce the overall figure size.

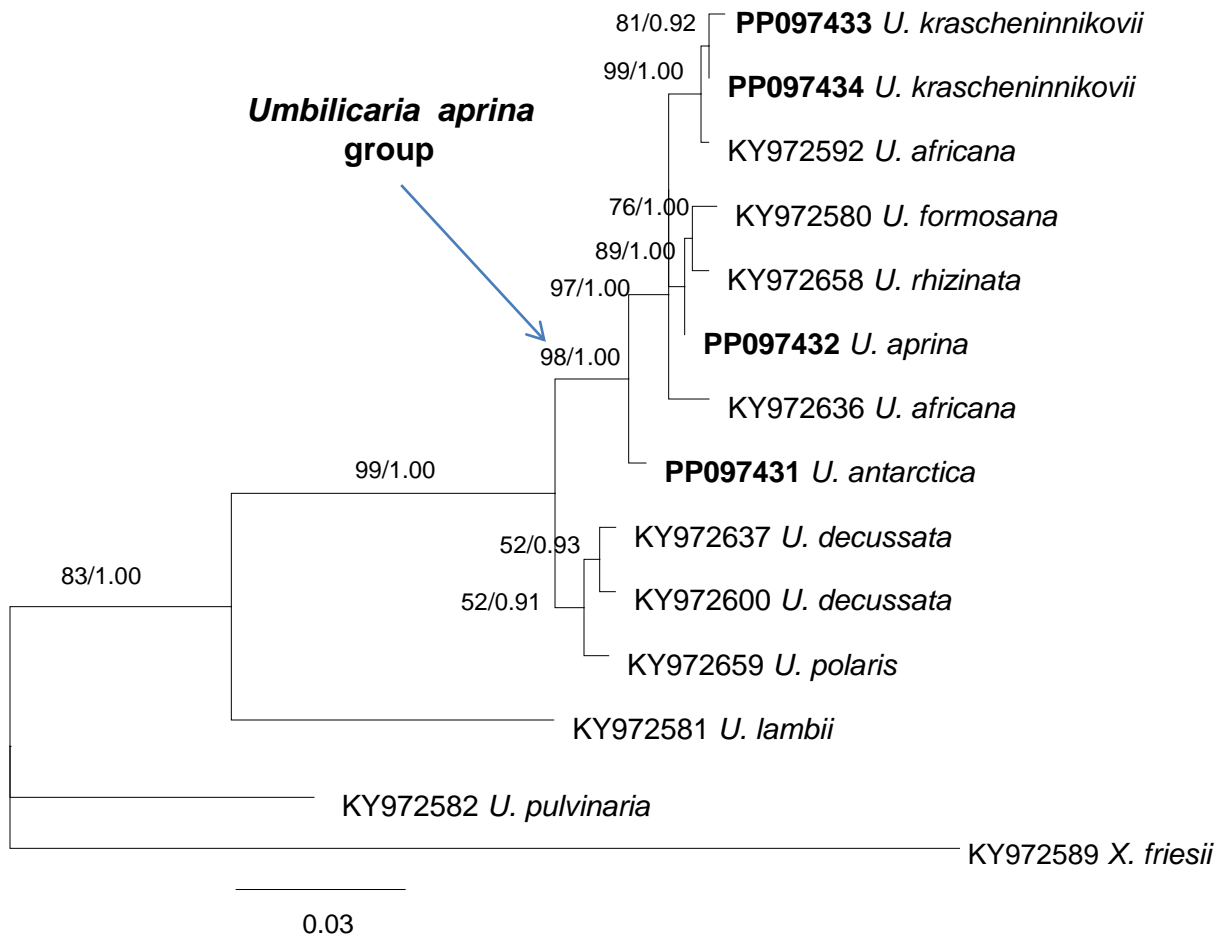

**Figure S4.** Phylogeny of *Umbilicaria aprina* group based on Maximum Likelihood analysis with IQ-TREE algorithm using the RNA polymerase II (RPB2) gene partial sequences. The species names and GenBank accession numbers are indicated. The number in each node represents bootstrap support (BS) and posterior probability (PP). Branch lengths represent the estimated number of substitutions per site assuming the respective models of substitution.

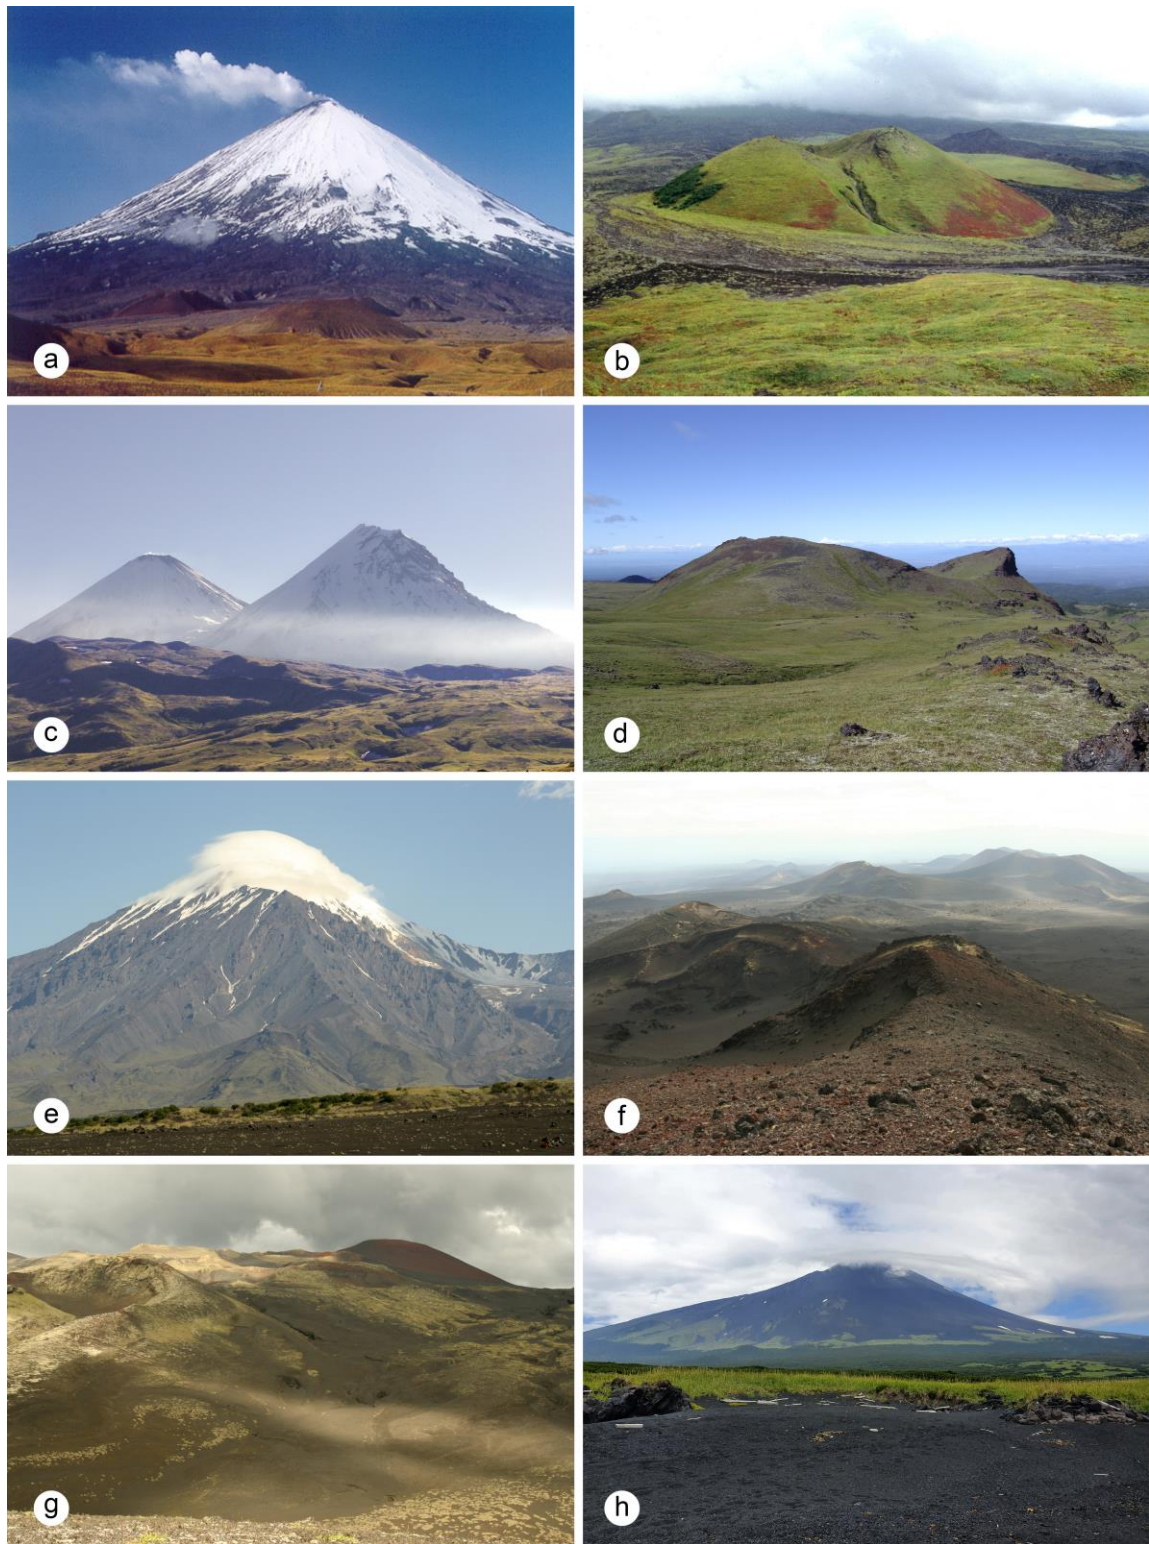

**Figure S5.** Typical habitats of *Umbilicaria krascheninnikovii* in Kamchatka Peninsula and Kurile Is.: (a) SE slope of Kluchevskaya Sopka Volcano; (b) Side (parasitic) cone and lava stream Apakhonchich on the SE slope of Kluchevskaya Sopka Volcano; (c) Ushkovsky Dale (foreground), volcanoes Kluchevskaya Sopka (left) and Kamen' (right); (d) Side cone on the SW slope of Ushkovsky Volcano; (e) N slope of Ostry Tolbachik Volcano; (f, g) Side cones on the SW slope of Tolbachik Volcano. *Umbilicaria krascheninnikovii* in such localities can be found on lava and volcanic bombs; (h) Alaid Volcano in the Atlasova Is.



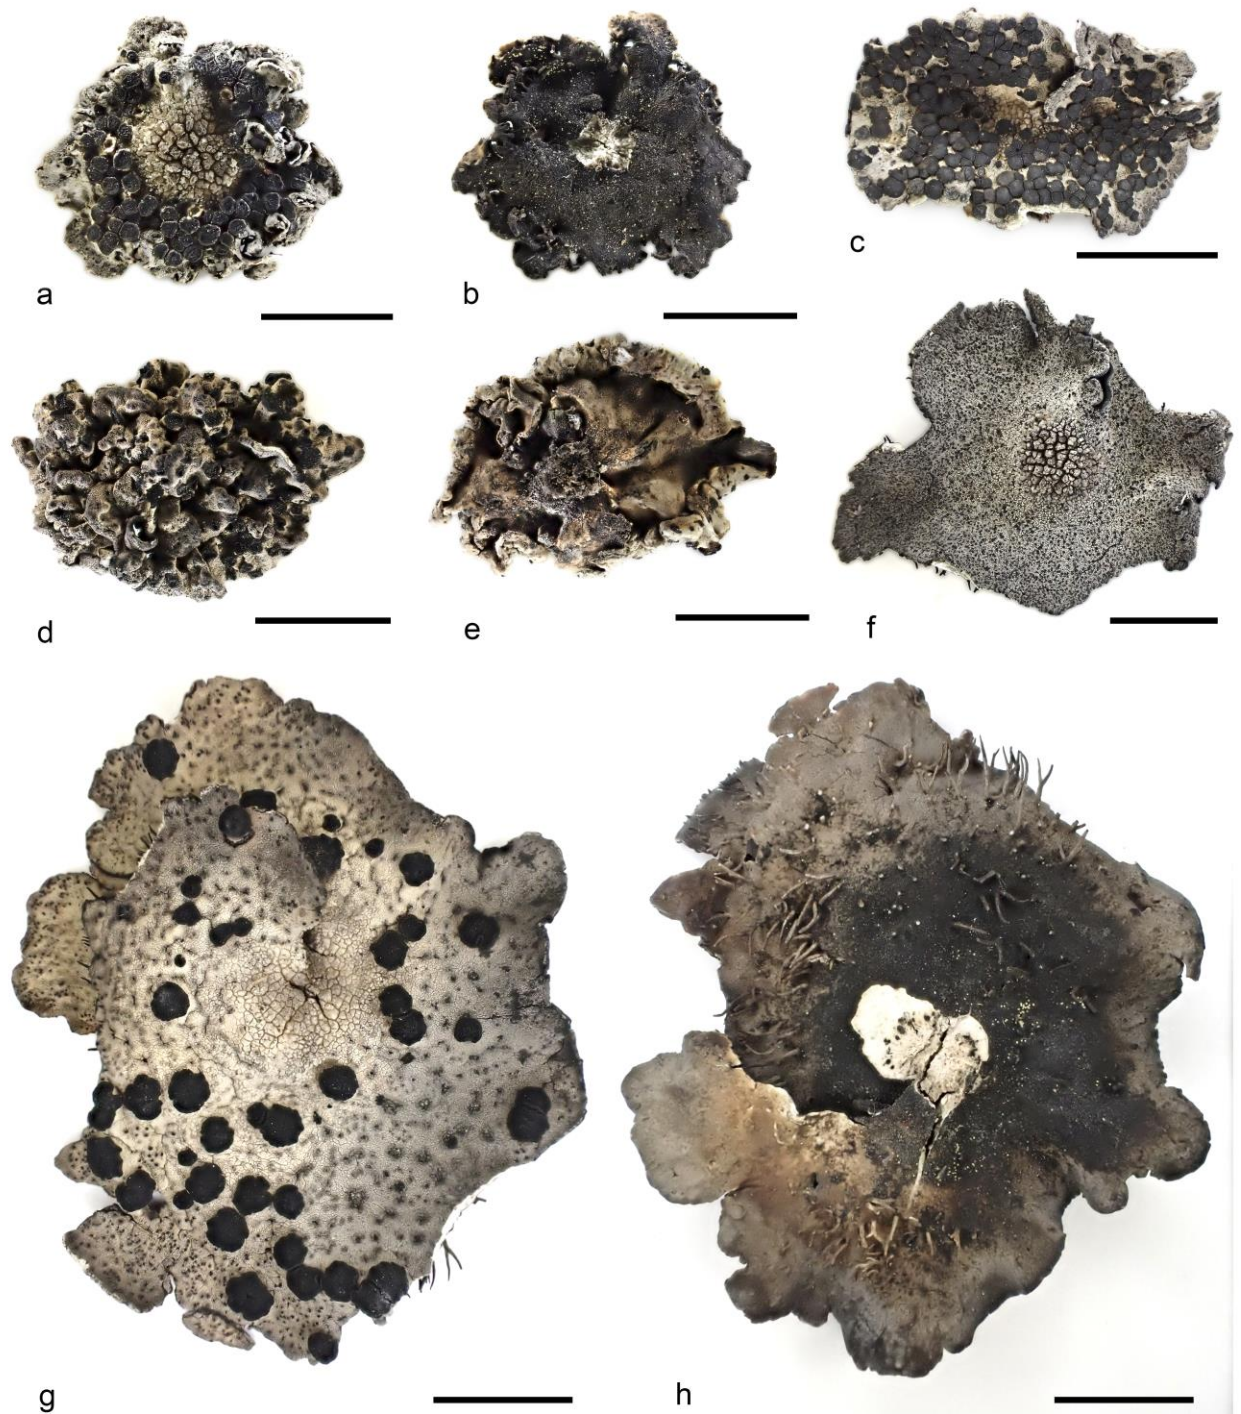

**Figure S6.** Variability of senescent specimens of *Umbilicaria krascheninnikovii*. A. Upper surface of small-sized senescent thallus with crowded apothecia; B. Entirely black lower surface; C. Upper surface of senescent thallus overgrown with apothecia; D. Irregularly wrinkled upper surface of small-sized senescent thallus with immature apothecia and pycnides; E. Light colored lower surface; F. Rather large senescent thallus without mature apothecia, but with numerous of black dots representing immature apothecia or/and pycnides; G. Uncommonly large senescent thallus with large lobate apothecia; H. Lower surface with scarce rhizinomorphs.

**Table S1. Lichen samples used in this study, including voucher information and GenBank accession numbers.**

| NAME           | Isolate  | Species name                        | Collection locality                                                           | Collector / Coll. No. | Herbarium / Acc. No. | ITS GB          | RPB2            | mtLSU           | mtSSU           |
|----------------|----------|-------------------------------------|-------------------------------------------------------------------------------|-----------------------|----------------------|-----------------|-----------------|-----------------|-----------------|
| U_africana_1   | acpED473 | Umbilicaria africana                | Ethiopia, Amhara region, Simien Mts. National Park                            | T. Lutsak 5002        | FR-220099            | KY947743        | KY972592        | KY947879        | <b>PP091988</b> |
| U_africana_2   | agrED352 | Umbilicaria africana                | Chile, XII Region, Isla Grande de Tierra de Fuego                             | S. Perez-Ortega 1774  | ALTB-L-5466          | KY947844        |                 | KY947971        | <b>PP091997</b> |
| U_africana_3   | altED623 | Umbilicaria africana                | East Antarctica, Enderby Land, Tala Hills                                     | V. E. Myamin          | ALTB-L-5503          |                 |                 | <b>PP092024</b> | <b>PP092004</b> |
| U_africana_4   | ED1139   | Umbilicaria africana                | East Antarctica, Enderby Land, Tala Hills                                     | V. E. Myamin          | ALTB                 | <b>PP084684</b> |                 |                 | <b>PP092007</b> |
| U_africana_5   | agrED173 | Umbilicaria africana (as U. aprina) | East Antarctica, Queen Maud Land, Schirmacher Oasis, Novolazarevskaya station | M. P. Andreev         | ALTB-L-158           | KY947808        | KY972636        | KY947931        | <b>PP091991</b> |
| U_antarctica_1 | agrED367 | Umbilicaria antarctica              | Antarctic, South Shetland Islands, King George Island, Barton Peninsula       | M. P. Andreev 39828   | ALTB                 | KY947849        | <b>PP097431</b> | KY947978        | <b>PP091999</b> |
| U_antarctica_2 | altED621 | Umbilicaria antarctica              | West Antarctica, Galindez Is.                                                 | M. P. Andreev         | ALTB                 |                 |                 | <b>PP092022</b> | <b>PP092002</b> |
| U_antarctica_3 | ED1137   | Umbilicaria antarctica              | West Antarctica, Galindez Is.                                                 | A. Utevskiy           | ALTB-L-6769          | <b>PP084682</b> |                 | <b>PP092025</b> | <b>PP092006</b> |
| U_antarctica_4 | ED1138   | Umbilicaria antarctica              | Antarctica, South Shetland Islands, King George Island, Filds Peninsula       | M. P. Andreev         | ALTB-L-6761          | <b>PP084683</b> |                 |                 |                 |

|                |          |                        |                                                                     |                                |                  |          |          |          |          |
|----------------|----------|------------------------|---------------------------------------------------------------------|--------------------------------|------------------|----------|----------|----------|----------|
| U_antarctica_5 | ED1140   | Umbilicaria antarctica | West Antarctica, Galindez Is.                                       | A. Utevskiy                    | ALTB-L-6769      | PP084685 |          | PP092026 | PP092008 |
| U_aprina_2     | agrED182 | Umbilicaria aprina     | Russia, Republic of Buryatia, Khamar-Daban Range, Baikalsky Reserve | G. P. Urbanavichus             | ALTB             | KY947810 |          | KY947933 | PP091993 |
| U_aprina_3     | agrED360 | Umbilicaria aprina     | Norway, Svalbard, Longyarbyen                                       | S. Perez-Ortega & S. Domaschke | ALTB-L-5479      | KY948014 |          | KY947976 | PP091998 |
| U_aprina_4     | agrED417 | Umbilicaria aprina     | Norway, Svalbard, Longyarbyen                                       | S. Perez-Ortega & S. Domaschke | ALTB-L-5479      | KY947859 | PP097432 | KY947989 | PP092001 |
| U_aprina_5     | ED1387   | Umbilicaria aprina     | Franz Josef Land, Alexandra Land, Severnaya Bay                     | S. V. Chesnokov                | ALTB-L-7730      | OR916138 |          |          |          |
| U_aprina_6     | ED1725   | Umbilicaria aprina     | Russia, Krasnoyarsk Territory, Sverdrup Is.                         | L. A. Konoreva                 | ALTB-L-7371      | OR916139 |          | PP092028 | PP092009 |
| U_aprina_7     | ED1738   | Umbilicaria aprina     | Russia, Krasnoyarsk Territory, Sverdrup Is.                         | L. A. Konoreva                 | ALTB-L-7372      | PP084686 |          | PP092029 | PP092010 |
| U_aprina_8     | ED1740   | Umbilicaria aprina     | Russia, Krasnoyarsk Territory, Sverdrup Is.                         | S. V. Chesnokov                | ALTB-L-7373      | PP084687 |          | PP092030 | PP092011 |
| U_aprina_9     | ED1754   | Umbilicaria aprina     | Russia, Krasnoyarsk Territory, Sverdrup Is.                         | S. V. Chesnokov                | ALTB-L-7370      | PP084688 |          |          | PP092012 |
| U_aprina_10    | ED1792   | Umbilicaria aprina     | Russia, Republic of Buryatia, Urgedeevsky Range                     | T. M. Kharpukhaeva             | UUH, ALTBL6594   | OR916140 |          |          |          |
| U_formosana_1  | acpED016 | Umbilicaria formosana  | Russia, Primorye Territory, Snezhnaya Mt.                           | I. S. Zhdanov                  | ALTB-L-5494      | KY947733 | KY972580 | KY947865 | PP091984 |
| U_formosana_2  | agrED165 | Umbilicaria formosana  | China, Yunnan, San Jiang                                            | A. Aptroot 55680               | ALTB-5482 ex ABL | KY947806 |          | KY947929 | PP091990 |
| U_formosana_3  | altED622 | Umbilicaria formosana  | Russia, Primorye Territory, Oblachnaya Mt.                          | E. A. Davydov 16626            | ALTB             | PP084681 |          | PP092023 | PP092003 |



|                           |          |                                      |                                                               |                                                          |                      |                 |                 |                 |                 |
|---------------------------|----------|--------------------------------------|---------------------------------------------------------------|----------------------------------------------------------|----------------------|-----------------|-----------------|-----------------|-----------------|
| U_krascheninnik<br>ovii_1 | agrED040 | Umbilicaria<br>krascheninnikovi<br>i | Russia, Kamchatka<br>Peninsula, Kluchevskaya<br>Sopka Volcano | D. E. Himelbrant &<br>E. S. Kuznetsova K-<br>51          | ALTB-5488 ex<br>LECB | KY947752        |                 | KY947896        |                 |
| U_krascheninnik<br>ovii_2 | agrED304 | Umbilicaria<br>krascheninnikovi<br>i | Russia, Kamchatka<br>Peninsula, Tolbachik<br>Volcano          | D. E. Himelbrant & I.<br>S. Stepanchikova K-<br>08-46/47 | LE L-7461            | <b>PP084680</b> | <b>PP097434</b> | KY947957        | <b>PP091996</b> |
| U_krascheninnik<br>ovii_3 | agrED414 | Umbilicaria<br>krascheninnikovi<br>i | Russia, Kamchatka<br>Peninsula, Tolbachik<br>Volcano          | D. E. Himelbrant & I.<br>S. Stepanchikova K-<br>226-06   | H                    | KY947857        |                 | KY947988        | <b>PP092000</b> |
| U_krascheninnik<br>ovii_4 | acpED007 | Umbilicaria<br>krascheninnikovi<br>i | Russia, Kamchatka<br>Peninsula, Tolbachik<br>Volcano          | D. E. Himelbrant & I.<br>S. Stepanchikova K-<br>08-46    | LE L-7461            | <b>PP084672</b> |                 | <b>PP092017</b> | <b>PP091980</b> |
| U_krascheninnik<br>ovii_5 | acpED008 | Umbilicaria<br>krascheninnikovi<br>i | Russia, Kamchatka<br>Peninsula, Ushkovsky<br>Volcano          | D. E. Himelbrant &<br>E. S. Kuznetsova K-<br>67-04       | LE L-7469            | <b>PP084673</b> |                 | <b>PP092018</b> | <b>PP091981</b> |
| U_krascheninnik<br>ovii_6 | acpED009 | Umbilicaria<br>krascheninnikovi<br>i | Russia, Kamchatka<br>Peninsula, Tolbachik<br>Volcano          | D. E. Himelbrant & I.<br>S. Stepanchikova s.<br>n.       | LE L-7501            | <b>PP084674</b> |                 |                 |                 |
| U_krascheninnik<br>ovii_7 | acpED010 | Umbilicaria<br>krascheninnikovi<br>i | Russia, Kamchatka<br>Peninsula, Tolbachik<br>Volcano          | D. E. Himelbrant & I.<br>S. Stepanchikova K-<br>Alaid-07 | LE L-7499            | <b>PP084675</b> | <b>PP097433</b> | <b>PP092019</b> | <b>PP091982</b> |
| U_krascheninnik<br>ovii_8 | acpED012 | Umbilicaria<br>krascheninnikovi<br>i | Russia, Kamchatka<br>Peninsula, Kluchevskaya<br>Sopka Volcano | D. E. Himelbrant &<br>E. S. Kuznetsova K-<br>64          | ALTB, LE L-7498      | <b>PP084676</b> |                 | <b>PP092020</b> |                 |
| U_krascheninnik<br>ovii_9 | acpED013 | Umbilicaria<br>krascheninnikovi<br>i | Russia, Kamchatka<br>Peninsula, Kluchevskaya<br>Sopka Volcano | D. E. Himelbrant &<br>E. S. Kuznetsova K-<br>51          | LE L-7482            | <b>PP084677</b> |                 | <b>PP092021</b> | <b>PP091983</b> |

|                        |           |                               |                                                                              |                                                    |                 |          |          |          |          |
|------------------------|-----------|-------------------------------|------------------------------------------------------------------------------|----------------------------------------------------|-----------------|----------|----------|----------|----------|
| U_krascheninnikovii_10 | acpED014  | Umbilicaria krascheninnikovii | Russia, Kamchatka Peninsula, Kluchevskaya Sopka Volcano                      | D. E. Himelbrant & E. S. Kuznetsova K-60           | ALTB, LE L-7496 | PP084678 |          |          |          |
| U_krascheninnikovii_11 | acpED015  | Umbilicaria krascheninnikovii | Russia, Kamchatka Peninsula, Kluchevskaya Sopka Volcano                      | D. E. Himelbrant & E. S. Kuznetsova Pesch-Apakh-02 | ALTB, LE L-7463 | PP084679 |          |          |          |
| U_rhizinata_1          | acpED001  | Umbilicaria rhizinata         | Russia, Republic of Altai, Altai Mts., Katunsky Range                        | E. A. Davydov 7446                                 | ALTB            | OR916141 |          | PP092013 | PP091977 |
| U_rhizinata_2          | acpED002  | Umbilicaria rhizinata         | Russia, Republic of Altai, Altai Mts., Katunsky Range                        | E. A. Davydov 7421                                 | ALTB            | OR916142 |          | PP092014 | PP091978 |
| U_rhizinata_3          | acpED003  | Umbilicaria rhizinata         | Russia, Republic of Altai, Altai Mts., Katunsky Range                        | E. A. Davydov 6879                                 | ALTB            | PP084670 |          | PP092015 | PP091979 |
| U_rhizinata_4          | acpED004  | Umbilicaria rhizinata         | Russia, Republic of Altai, Altai Mts., Katunsky Range                        | E. A. Davydov 7447                                 | ALTB            | PP084671 |          | PP092016 |          |
| U_rhizinata_5          | acpED006  | Umbilicaria rhizinata         | Russia, Kamchatka Peninsula, Petropavlovsk Kamchatsky, Mishennaya Sopka Hill | D. E. Himelbrant & E. S. Kuznetsova K-1            | LE L-7465       | OR916143 |          |          |          |
| U_rhizinata_6          | agrED295  | Umbilicaria rhizinata         | Russia, Altai Territory, Altai Mts., Tigireksy Range                         | E. A. Davydov 7258                                 | ALTB            | KY948011 | KY972658 | KY947954 | PP091994 |
| U_rhizinata_7          | altbED287 | Umbilicaria rhizinata         | Russia, Altai Territory, Altai Mts., Tigireksy Range                         | E. A. Davydov 7562                                 | ALTB            | OR916144 |          |          |          |

|                   |          |                        |                                                               |                        |            |          |          |          |          |          |
|-------------------|----------|------------------------|---------------------------------------------------------------|------------------------|------------|----------|----------|----------|----------|----------|
| U_rhizinata_8     | altED638 | Umbilicaria rhizinata  | USA, Alaska, Gates of the Arctic Park and Reserve             | P. Nelson 12-1184      | ALTB       |          |          |          |          | PP092005 |
| U_rhizinata_9     | ED1290   | Umbilicaria rhizinata  | Russia, Krasnoyarsk Territory, Noril'sk                       | A.A. Ul'yanovskiy      | ALTB       | OR916145 |          |          | PP092027 |          |
| U_rhizinata_10    | ED1789   | Umbilicaria rhizinata  | Russia, Republic of Buryatia, Nam-Tzagan-Khutliyn-Nuruu Range | T. M. Kharpukhaeva     | UUH L01925 | OR916146 |          |          | PP092031 |          |
| U_rhizinata_11    | ED2263   | Umbilicaria rhizinata  | Russia, Magadan Region, Malyk Lake                            | E. V. Zheludeva SU4883 | MAG        | OR916147 |          |          |          |          |
| U_rhizinata_12    | ED2264   | Umbilicaria rhizinata  | Russia, Magadan Region, Urultun Lake                          | E. V. Zheludeva SU4884 | MAG        | OR916148 |          |          |          |          |
| U_lambii          | acpED017 | Umbilicaria lambii     | Canada, British Columbia, Trophy Mt.                          | M.P Zhurbenko 020702-2 | ALTB-L193  | KY947734 | KY972581 | KY947866 | PP091985 |          |
| U_pulvinaria      | acpED018 | Umbilicaria pulvinaria | Russia, Sakhalin Is, Schmidt Peninsula, Elizabeth Cape        | S. I. Tchabanenko      | ALTB       | KY947735 | KY972582 | KY947867 | PP091986 |          |
| U_decussata_1     | agrED022 | Umbilicaria decussata  | Kazakhstan, Altai Mts., Saur Range                            | D. A. German           | ALTB-L153  | KY948001 | KY972600 | KY947891 | PP091989 |          |
| U_decussata_2     | agrED174 | Umbilicaria decussata  | Antarctica, Hasuell Is.                                       | M. P. Andreev 041601   | ALTB-L157  | KY947809 | KY972637 | KY947932 | PP091992 |          |
| U_polaris         | agrED296 | Umbilicaria polaris    | Russia, Altai Territory, Altai Mts., Tigireksky Range         | E. A. Davydov 7251     | ALTB       | KY947830 | KY972659 | KY947955 | PP091995 |          |
| Xylopsora_friesii | acpED467 | Xylopsora friesii      | Russia, Murmansk Region, Pasvik Reserve                       | G. P. Urbanavichus     | ALTB-L5425 | KY947740 | KY972589 | KY947876 | PP091987 |          |

**Table S2. Examined specimens of *Umbilicaria krascheninnikovii*.**

| Collection region           | Locality                                                                                                                                   | Coordinates                    | Altitude             | Biotope                                           | Date       | Collector / Coll. No.                             | Herbarium /No.       | Isolate  |
|-----------------------------|--------------------------------------------------------------------------------------------------------------------------------------------|--------------------------------|----------------------|---------------------------------------------------|------------|---------------------------------------------------|----------------------|----------|
| Russia, Kamchatka Peninsula | Central Kamchatka, Ust'-Kamchatsk District, c. 30 km S of Kluchi, E slope of volcano Kluchevskaya Sopka, lava stream Apakhonchich          | 56°01'42"N,<br>160°45'02"E     | 1580 m a. s.<br>l.   | on stones                                         | 26.08.2002 | D. E. Himelbrant & E. S. Kuznetsova K-51          | ALTB-5488<br>ex LECB | agrED040 |
| Russia, Kamchatka Peninsula | Central Kamchatka, Mil'kovo District, Kamchatka River basin, SW slope of Tolbachik volcano, c. 40 km SE of Kozyrevsk                       | 55°46'35"N,<br>160°18'42"E     | 1630 m a. s.<br>l.   | on lava stream                                    | 16.08.2008 | D. E. Himelbrant & I. S. Stepanchikova K-08-46/47 | LE L-7461            | agrED304 |
| Russia, Kamchatka Peninsula | Central Kamchatka, Mil'kovo District, Kamchatka River basin, SW slope of Tolbachik volcano, ca. 40 km SE of Kozyrevsk. Lava stream of 1941 | 55°46'55"N,<br>160°17'18"E     | 1429 m a. s.<br>l.   | stony mossy tundra with dwarf shrubs on the slope | 11.08.2006 | D. E. Himelbrant & I. S. Stepanchikova K-226-06   | H                    | agrED414 |
| Russia, Kamchatka Peninsula | Central Kamchatka, Mil'kovo District, Kamchatka River basin, SW slope of Tolbachik volcano, c. 40 km SE of Kozyrevsk                       | 55°46'35"N,<br>160°18'42"E     | 1630 m a. s.<br>l.   | on lava stream                                    | 16.08.2008 | D. E. Himelbrant & I. S. Stepanchikova K-08-46    | LE L-7461            | acpED007 |
| Russia, Kamchatka Peninsula | Central Kamchatka, Ust'-Kamchatsk District, c. 24 km SE of Kozyrevsk, Kamchatka River basin, SW slope of Ushkovsky volcano                 | 55°57'51.3"N,<br>160°14'28.2"E | 1080 m a. s.<br>l.   | on lava stones                                    | 14.08.2004 | D. E. Himelbrant & E. S. Kuznetsova K-67-04       | LE L-7469            | acpED008 |
| Russia, Kamchatka Peninsula | Central Kamchatka, Mil'kovo District, Southern slope of Tolbachik Volcano                                                                  | 55°44'N,<br>160°11'E           | c. 700 m a.<br>s. l. | on lava outcrops                                  | 10.08.2006 | D. E. Himelbrant & I. S. Stepanchikova s. n.      | LE L-7501            | acpED009 |

|                             |                                                                                                                                                           |                         |                   |                                        |            |                                                    |           |          |
|-----------------------------|-----------------------------------------------------------------------------------------------------------------------------------------------------------|-------------------------|-------------------|----------------------------------------|------------|----------------------------------------------------|-----------|----------|
| Russia, Kamchatka Peninsula | Central Kamchatka, Mil'kovo District, c. 44 km SE of Kozyrevsk, Kamchatka River basin, SW slope of Tolbachik volcano, Alaid lava stream                   | 55°43'N, 160°13'E       | 1330 m a. s. l.   | on lava stream                         | 29.08.2007 | D. E. Himelbrant & I. S. Stepanchikova K-Alaid-07  | LE L-7499 | acpED010 |
| Russia, Kamchatka Peninsula | Central Kamchatka, Ust'-Kamchatsk District, c. 30 km S of Kluchi, E slope of volcano Kluchevskaya Sopka, lava stream Apakhonchich                         | 55°59'38"N, 160°50'29"E | 770 m a. s. l.    | lava outcrops with seldom Salix shrubs | 29.08.2002 | D. E. Himelbrant & E. S. Kuznetsova K-64           | LE L-7498 | acpED012 |
| Russia, Kamchatka Peninsula | Central Kamchatka, Ust'-Kamchatsk District, c. 30 km S of Kluchi, E slope of volcano Kluchevskaya Sopka, lava stream Apakhonchich                         | 56°01'42"N, 160°45'02"E | 1580 m a. s. l.   | on stones                              | 26.08.2002 | D. E. Himelbrant & E. S. Kuznetsova K-51           | LE L-7482 | acpED013 |
| Russia, Kamchatka Peninsula | Central Kamchatka, Ust'-Kamchatsk District, c. 30 km S of Kluchi, E slope of volcano Kluchevskaya Sopka, lava stream Peschernyj                           | 55°59'N, 160°47'E       | 1050 m a. s. l.   | on stones                              | 28.08.2002 | D. E. Himelbrant & E. S. Kuznetsova K-60           | LE L-7496 | acpED014 |
| Russia, Kamchatka Peninsula | Central Kamchatka, Ust'-Kamchatsk District, E slope of Kluchevskaya Sopka volcano, c. 30 km S of Kluchi, between lava streams Apakhonchich and Peschernyj | 55°59'N, 160°49'E       | c. 900 m a. s. l. | on lava                                | 28.08.2002 | D. E. Himelbrant & E. S. Kuznetsova Pesch-Apakh-02 | LE L-7463 | acpED015 |
| Russia, Kamchatka Peninsula | SE Kamchatka, Elizovo District, Petropavlovsk-Kamchatsky, E slope of Mishennaya Sopka Hill                                                                | 53°02'36"N, 158°38'28"E | 370 m a. s. l.    | lava outcrops                          | 29.07.2002 | D. E. Himelbrant & E. S. Kuznetsova K-1            | LE L-7466 |          |



|                             |                                                                                                                                                        |                             |                    |                                                  |            |                                                |           |  |
|-----------------------------|--------------------------------------------------------------------------------------------------------------------------------------------------------|-----------------------------|--------------------|--------------------------------------------------|------------|------------------------------------------------|-----------|--|
| Russia, Kamchatka Peninsula | SE Kamchatka, Elizovo District, Kronotsky Nature Reserve, 5 km S of Krashenninnikova Volcano, vicinity of Svetlaya River                               | 54°30'N, 160°17'E           | c. 400 m a. s. l.  | lava stream, on lava                             | 06.08.1985 | A. Mikulin 1-653-d                             | LE L-5778 |  |
| Russia, Kamchatka Peninsula | Central Kamchatka, Ust'-Kamchatsk District, c. 30 km S of Kluchi, E slope of volcano Kluchevskaya Sopka, lava stream Apakhonchich                      | 56°01'20.4"N, 160°45'51.1"E | 1420 m a. s. l.    | on stones                                        | 26.08.2002 | D. E. Himelbrant & E. S. Kuznetsova K-53       | LE L-6887 |  |
| Russia, Kamchatka Peninsula | Central Kamchatka, Ust'-Kamchatsk District, c. 18 km S of Kluchi, NE slope of the volcano Kluchevskaya Sopka, near crater and volcanic station Podkova | 56°07'54.2"N, 160°47'00.8"E | 1040 m a. s. l.    | on stones                                        | 31.08.2002 | D. E. Himelbrant & E. S. Kuznetsova K-70       | LE L-7467 |  |
| Russia, Kamchatka Peninsula | Central Kamchatka, Ust'-Kamchatsk District, c. 40 km SE of Kozyrevsk, Kamchatka River basin, SW slope of Ushkovsky volcano                             | 55°55'49.4"N, 160°19'37.8"E | 1030 m a. s. l.    | Larix cajanderi sparse forest, on stones         | 21.08.2005 | D. E. Himelbrant & E. S. Kuznetsova K-189-05   | LE L-7472 |  |
| Russia, Kamchatka Peninsula | Central Kamchatka, Mil'kovo District, S slope of Tolbachik Volcano, c. 44 km SE of Kozyrevsk, Alaid tephra field                                       | 55°42'32"N, 160°13'24"E     | 860 m a. s. l.     | community on lava sprinkled with scoria, on lava | 22.08.2007 | D. E. Himelbrant & I. S. Stepanchikova K-36-07 | LE L-7473 |  |
| Russia, Kamchatka Peninsula | Central Kamchatka, Mil'kovo District, c. 44 km SE of Kozyrevsk, Kamchatka River basin, SW slope of Tolbachik volcano, Alaid lava stream                | 55°43'N, 160°13'E           | c. 1300 m a. s. l. | on stones                                        | 29.08.2007 | D. E. Himelbrant & I. S. Stepanchikova 1107-07 | LE L-7477 |  |

|                             |                                                                                                                                         |                             |                    |                               |            |                                                |           |  |
|-----------------------------|-----------------------------------------------------------------------------------------------------------------------------------------|-----------------------------|--------------------|-------------------------------|------------|------------------------------------------------|-----------|--|
| Russia, Kamchatka Peninsula | Central Kamchatka, Mil'kovo District, c. 44 km SE of Kozyrevsk, Kamchatka River basin, SW slope of Tolbachik volcano, Alaid lava stream | 55°43'N, 160°13'E           | c. 1300 m a. s. l. | on stones                     | 29.08.2007 | D. E. Himelbrant & I. S. Stepanchikova 1107-07 | LE L-7478 |  |
| Russia, Kamchatka Peninsula | Central Kamchatka, Ust'-Kamchatsk District, c. 45 km NE of Kluchi, W slope of volcano Shiveluch                                         | 56°35'16"N, 161°12'59"E     | 1110 m a. s. l.    | lichen-herb tundra, on stones | 24.08.2002 | D. E. Himelbrant & E. S. Kuznetsova K-50       | LE L-7479 |  |
| Russia, Kamchatka Peninsula | Central Kamchatka, Ust'-Kamchatsk District, c. 45 km NE of Kluchi, W slope of volcano Shiveluch                                         | 56°35'16"N, 161°12'59"E     | 1110 m a. s. l.    | lichen-herb tundra, on stones | 24.08.2002 | D. E. Himelbrant & E. S. Kuznetsova K-50       | LE L-7480 |  |
| Russia, Kamchatka Peninsula | Central Kamchatka, Ust'-Kamchatsk District, c. 30 km S of Kluchi, E slope of volcano Kluchevskaya Sopka, lava stream Apakhonchich       | 56°01'20.4"N, 160°45'51.1"E | 1420 m a. s. l.    | on stones                     | 26.08.2002 | D. E. Himelbrant & E. S. Kuznetsova K-53       | LE L-7485 |  |
| Russia, Kamchatka Peninsula | Central Kamchatka, Ust'-Kamchatsk District, c. 30 km S of Kluchi, E slope of volcano Kluchevskaya Sopka, lava stream Apakhonchich       | 56°01'20.4"N, 160°45'51.1"E | 1420 m a. s. l.    | on stones                     | 26.08.2002 | D. E. Himelbrant & E. S. Kuznetsova K-53       | LE L-7486 |  |
| Russia, Kamchatka Peninsula | Central Kamchatka, Ust'-Kamchatsk District, c. 30 km S of Kluchi, E slope of volcano Kluchevskaya Sopka, lava stream Apakhonchich       | 56°01'08"N, 160°46'24.3"E   | 1300 m a. s. l.    | on stones                     | 26.08.2002 | D. E. Himelbrant & E. S. Kuznetsova K-54       | LE L-7489 |  |
| Russia, Kamchatka Peninsula | Central Kamchatka, Ust'-Kamchatsk District, c. 30 km S of Kluchi, E slope of volcano Kluchevskaya Sopka, lava stream Apakhonchich       | 56°00'52.4"N, 160°47'24.1"E | 1140 m a. s. l.    | on stones                     | 26.08.2002 | D. E. Himelbrant & E. S. Kuznetsova K-56       | LE L-7493 |  |

|                             |                                                                                                                                   |                             |                     |           |            |                                          |           |  |
|-----------------------------|-----------------------------------------------------------------------------------------------------------------------------------|-----------------------------|---------------------|-----------|------------|------------------------------------------|-----------|--|
| Russia, Kamchatka Peninsula | Central Kamchatka, Ust'-Kamchatsk District, c. 30 km S of Kluchi, E slope of volcano Kluchevskaya Sopka, lava stream Apakhonchich | 56°00'52.4"N, 160°47'24.1"E | 1140 m a. s. l.     | on stones | 26.08.2002 | D. E. Himelbrant & E. S. Kuznetsova K-56 | LE L-7494 |  |
| Russia, Kamchatka Peninsula | Central Kamchatka, Ust'-Kamchatsk District, c. 30 km S of Kluchi, E slope of volcano Kluchevskaya Sopka, lava stream Bilukaj      | 56°03'23.0"N, 160°50'53.5"E | 830 m a. s. l.      | on stones | 27.08.2002 | D. E. Himelbrant & E. S. Kuznetsova K-59 | LE L-7495 |  |
| Russia, Kurile Is.          | Araitō Is. [=Atlasova Is.]: on route from Minami-ura to Ichinowatashi                                                             |                             |                     |           | 15.07.1931 | Y. Okada                                 | TNS       |  |
| Japan. Honshu Is.           | Shizuoka-ken, Sunto-gun, Oyama-cho, Mt. Fuji                                                                                      |                             | ca. 3700 m a. s. l. | on rock   | 10.09.2002 | K. Takahashi 1808                        | HIRO      |  |
